# Supplementary material for: Growth kinetics of the adsorbed layer of poly(bisphenol A carbonate) and its effect on the glass transition behavior in thin films
Source: Royal Society of Chemistry journal article supplement (doi:10.1039/d3ra02020g), 2023-01-01
Supplement: d3ra02020g1.pdf [file d3ra02020g1.pdf]

## Supporting Information

### Growth Kinetics of the Adsorbed Layer of Poly (bisphenol-A carbonate) and its Effect on the Glass Transition Behavior in Thin Films

*Hassan Omar, Gundula Hide, Paulina Szymoniak, Andreas Hertwig and Andreas Schönhals\**

Bundesanstalt für Materialforschung und –prüfung (BAM),  
Unter den Eichen 87, 12205 Berlin (Germany)

\*CORRESPONDING AUTHOR: A. Schönhals, BAM Bundesanstalt für Materialforschung und -prüfung (Fachbereich 6.6), Unter den Eichen 87, 12205 Berlin, Germany;  
Tel. +49 30 / 8104-3384; Fax: +49 30 / 8104-1617; Email: [Andreas.Schoenhals@bam.de](mailto:Andreas.Schoenhals@bam.de)

Analysis of the ellipsometric data:

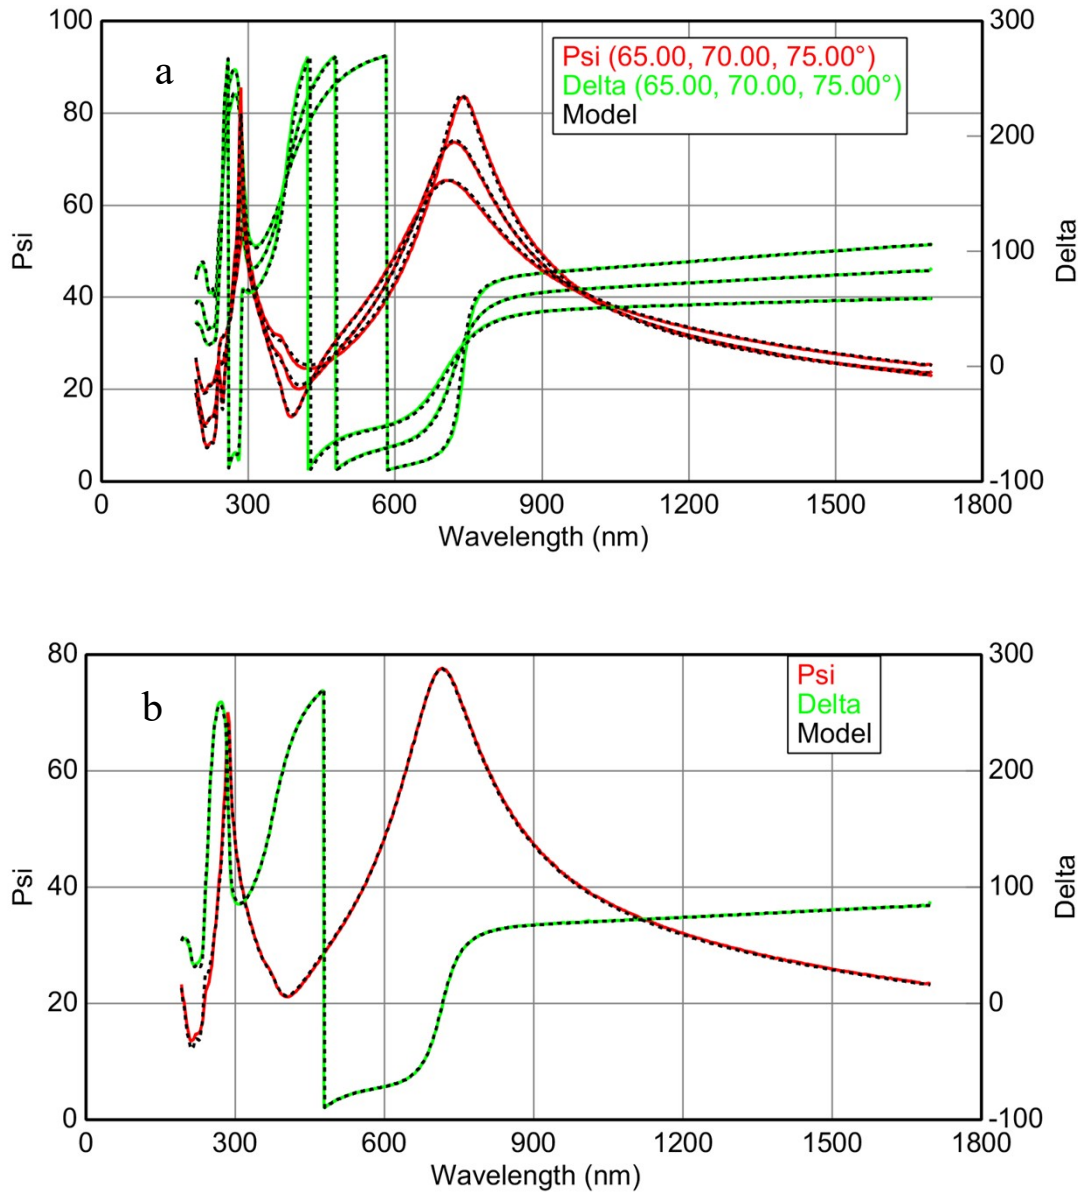

**Figure S1:** Examples for the analysis of the ellipsometric data (Psi - red, delta – green) for a PBAC film with a thickness of 140 nm: a – multi-angle measurements at the angles 65 °, 70 ° and 75 °, b – Single angle measurement at 70 ° during a heating scan at 180 °C (t=62 min). The dotted lines in both figures are the fit of the model to both set of data.

Comparison of the film thickness obtained by AFM measurements and spectroscopic ellipsometry:

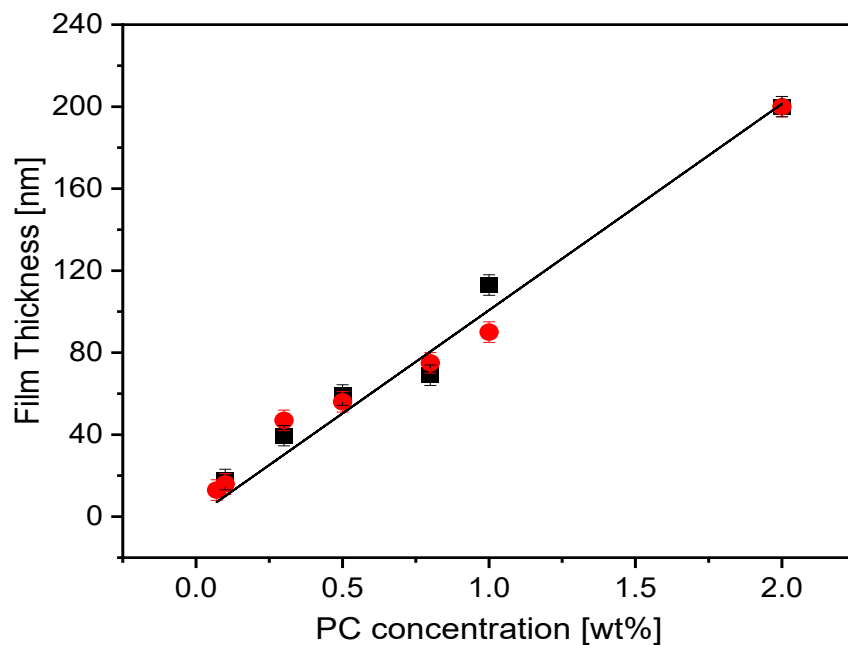

**Figure S2:** Film thickness of various diluted solutions measured by both AFM (black squares) and Ellipsometry (red circles). The solid line is a linear fit to both sets of data

Analysis of the DSC measurements:

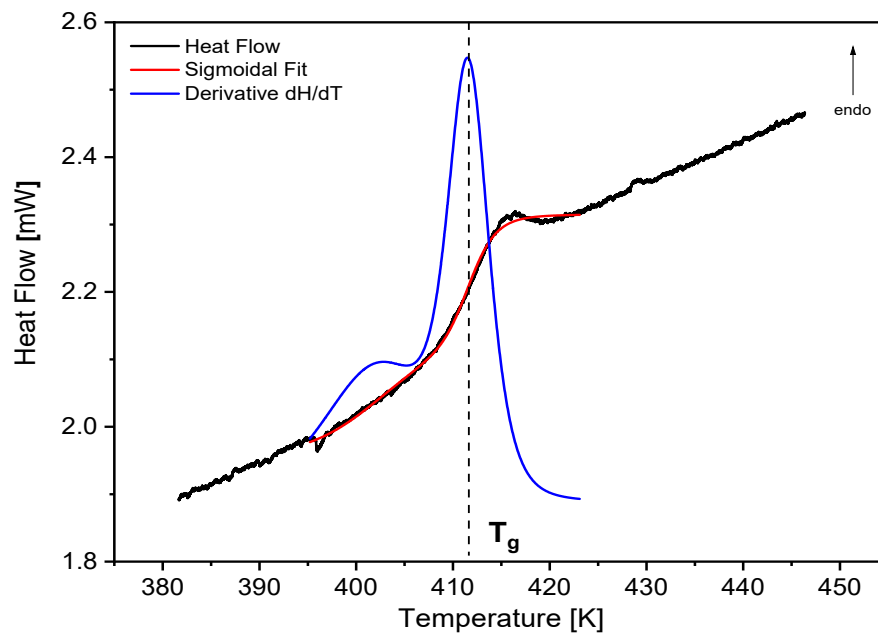

**Figure S3:** Heat flow curve (black line) with a sigmoidal function fit to the data (red line). The derivative of the sigmoidal fit (blue line) with the peak height taken as the glass transition temperature ( $T_g$ ).
